# Supplementary material for: In situ reconstruction of vegetable sponge-like Bi2O3 for efficient CO2 electroreduction to formate
Source: Royal Society of Chemistry journal article supplement (doi:10.1039/d1qm01557e), 2022-01-01
Supplement: d1qm01557e1.pdf [file d1qm01557e1.pdf]

## Supporting Information

### ***In situ* reconstruction of vegetable sponge-like Bi<sub>2</sub>O<sub>3</sub> for efficient CO<sub>2</sub> electroreduction to formate**

*Yingli Shi, Chun Fang Wen, Xuefeng Wu, Jia Yue Zhao, Fangxin Mao\*, Peng Fei Liu,*

*Hua Gui Yang\**

Key Laboratory for Ultrafine Materials of Ministry of Education, Shanghai Engineering  
Research Center of Hierarchical Nanomaterials, School of Materials Science and  
Engineering, East China University of Science and Technology. 130 Meilong Road,  
Shanghai 200237, China.

Email: [hgyang@ecust.edu.cn](mailto:hgyang@ecust.edu.cn), [fxmao@ecust.edu.cn](mailto:fxmao@ecust.edu.cn).

## Experimental section

### Chemicals

Bismuth(III) nitrate pentahydrate ( $\text{Bi}(\text{NO}_3)_3 \cdot 5\text{H}_2\text{O}$ ) and hydrochloric acid (HCl, 36.0~38.0%) was purchased from Sinopharm Chemical reagent Co., Ltd. Dicyandiamide (DCD) was obtained from Alfa Aesar. Ethylene glycol (EG), Potassium hydroxide and acetone were from Yonghua Chemical Co., Ltd. Ethanol was bought from Shanghai Titan Scientific Co., Ltd. Sustainion™ XA-9 (5% in ethanol) was obtained from Dioxide Materials. All chemicals were of analytical grade and used without any further purification. Deionized (DI) water used in our experiments was supplied by Milli-Q System (Millipore, Billerica, MA).

### Electrochemical measurements

We used the three-electrode system flow cell setup to carry out the  $\text{CO}_2\text{RR}$  processes, among which the three electrodes refer to the working electrode, reference electrode and counter electrode. The counter electrode is a piece of pretreated nickel foam with area of  $3 \times 3 \text{ cm}^2$ . Typical pretreatment procedure is that ultrasonic washing with 3 M HCl, acetone, ethanol and deionized water for 15 min in sequence and followed by drying in the vacuum oven.

### Faradaic efficiency calculations

The Faradaic efficiency (FE) for formation of CO or  $\text{H}_2$  was calculated as below:

$$\text{FE} = \frac{2\chi \times p \times G \times F}{I \times R \times T}$$

$\chi$  (vol%) is the volume fractions of CO or  $\text{H}_2$ ,  $I$  (A) is the steady-state total current,  $G = 20 \text{ sccm}$  is the flow rate of  $\text{CO}_2$ ,  $p = 1.013 \times 10^5 \text{ Pa}$ ,  $T = 293.15 \text{ K}$ ,  $F = 96485 \text{ C}$

$\text{mol}^{-1}$ ,  $R = 8.3145 \text{ J mol}^{-1} \text{ K}^{-1}$ .

Liquid product of  $\text{HCOO}^-$  was quantified using  $^1\text{H}$  nuclear magnetic resonance (NMR). The Faradaic efficiency for formation of  $\text{HCOO}^-$  was calculated as the following:

$$\text{FE} = \frac{2F \times n_{\text{HCOO}^-}}{I \times t}$$

$n_{\text{HCOO}^-}$  (mol) is measured quantity of  $\text{HCOO}^-$  and  $t$  (s) is electrolytic time.

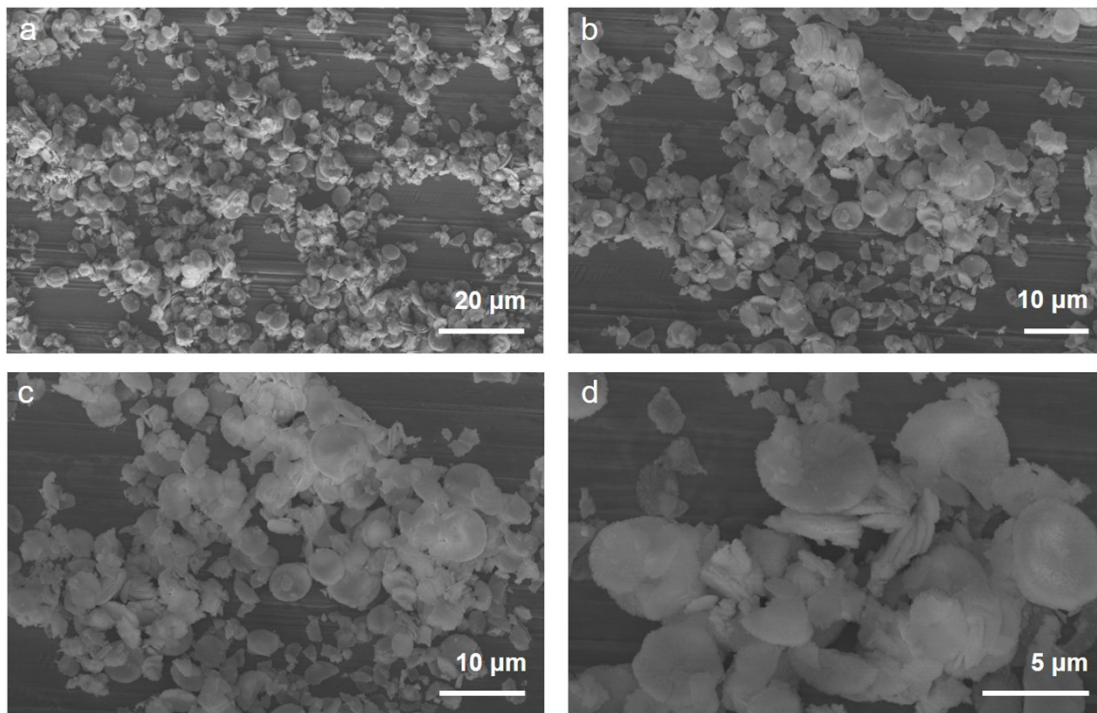

**Figure S1** SEM images of VS-Bi<sub>2</sub>O<sub>3</sub>, showing the large-scale morphology.

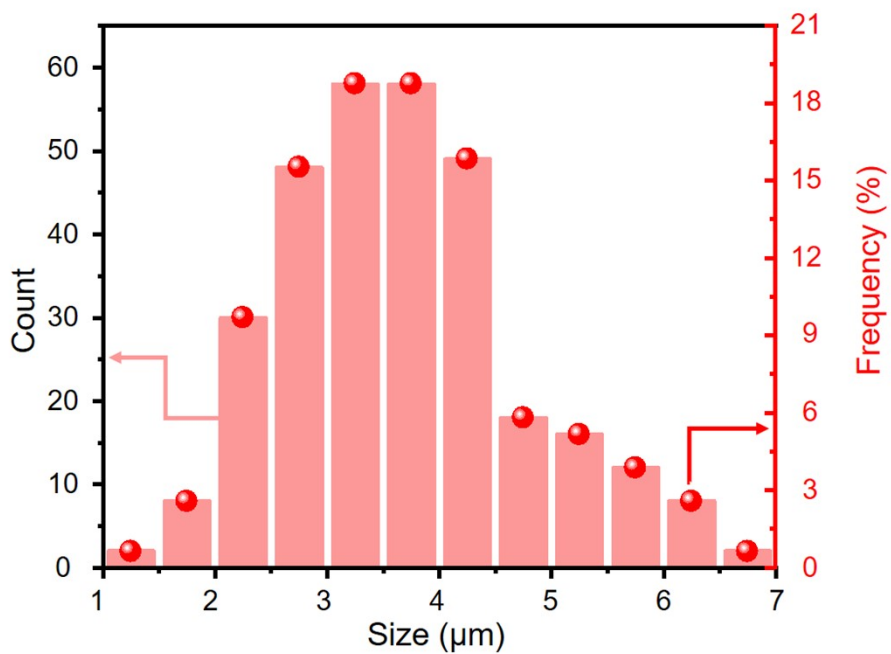

**Figure S2** Size distribution statistics of VS-Bi<sub>2</sub>O<sub>3</sub> (conducted based on the SEM image of Figure S1a) with main size about 3-4 μm.

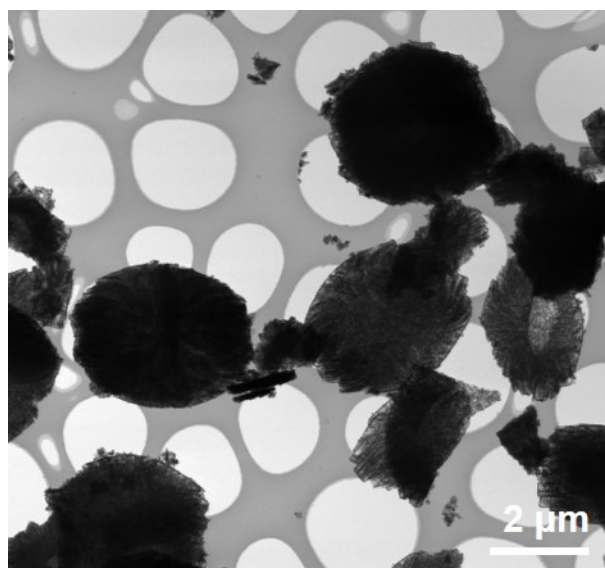

**Figure S3** Low-resolution TEM image of VS-Bi<sub>2</sub>O<sub>3</sub>, showing its porous vegetable sponge-like morphology.

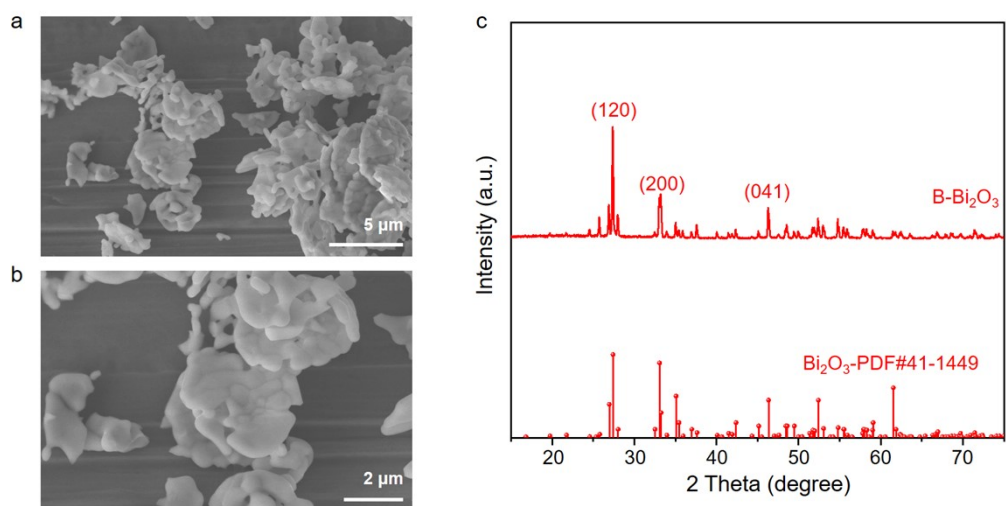

**Figure S4** (a, b) SEM images of B-Bi<sub>2</sub>O<sub>3</sub>, showing smoother surface than the VS-Bi<sub>2</sub>O<sub>3</sub> sample. (c) XRD pattern of B-Bi<sub>2</sub>O<sub>3</sub> in line with monoclinic Bi<sub>2</sub>O<sub>3</sub>-PDF#41-1449.

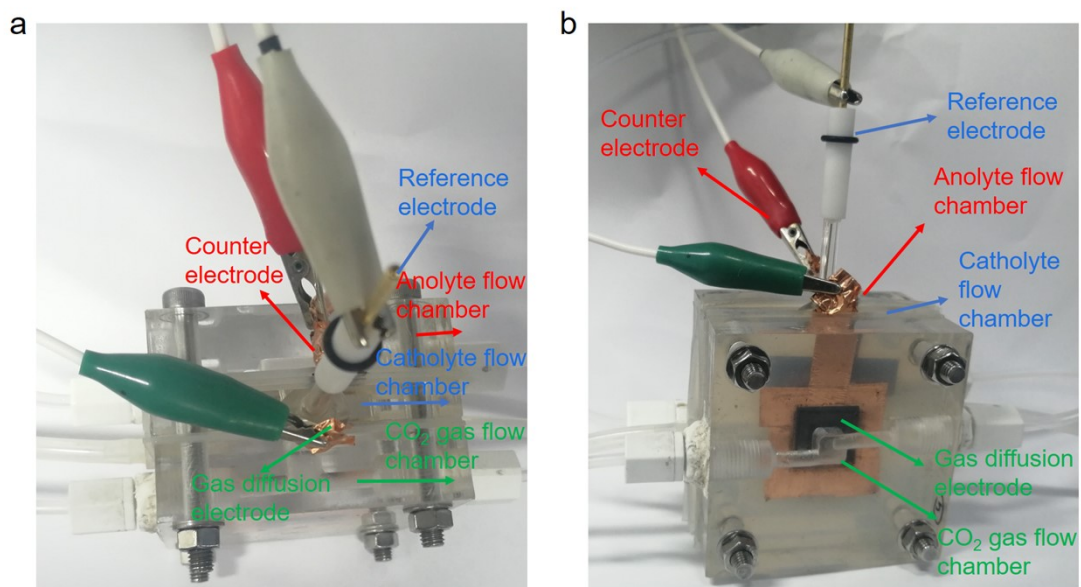

**Figure S5** Flow cell setup. In the three-electrode setup, the Ag/AgCl electrode was applied as the reference electrodes, and the pretreated nickel foam was used as counter electrode, also known as anode, for the anodic oxygen evolution reaction. The flow cell design provides a gas-liquid-solid triple phase boundary, which serves as the spot where CO<sub>2</sub> reduction reaction carries out.



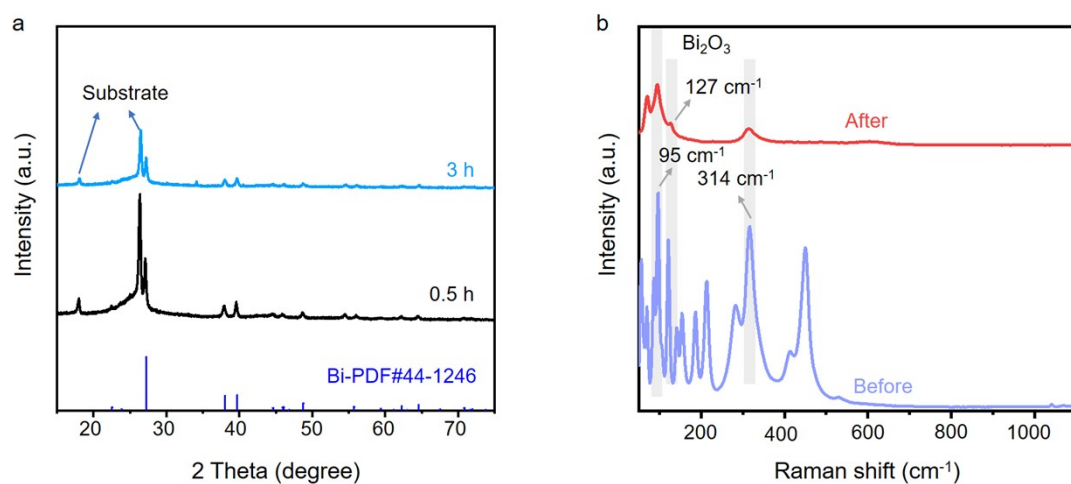

**Figure S6** (a) XRD patterns of post-electrolysis (for 0.5 and 3 h, respectively) of B-Bi<sub>2</sub>O<sub>3</sub>, well indexed to metallic bismuth (Note that the substrate is GDE). (b) Raman spectra of B-Bi<sub>2</sub>O<sub>3</sub> before reaction (blue line) and after reaction (red line) for 3 h, both of which show the existence of Bi<sub>2</sub>O<sub>3</sub> (light grey shadow) without Bi<sub>2</sub>O<sub>2</sub>CO<sub>3</sub> detected. Figure S6a, b indicate the lack of Bi<sub>2</sub>O<sub>2</sub>CO<sub>3</sub> for B-Bi<sub>2</sub>O<sub>3</sub> under the CO<sub>2</sub>RR process.

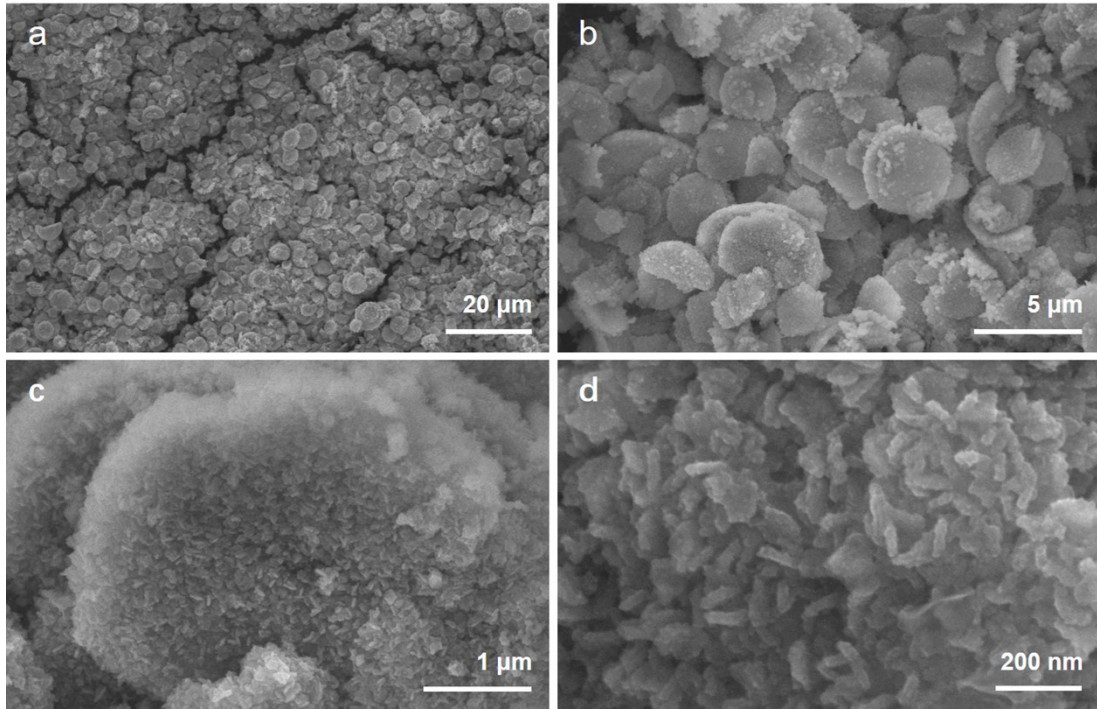

**Figure S7** SEM images of post-electrolysis (for 3 h) sample of VS-Bi<sub>2</sub>O<sub>3</sub>, showing the thick nanoplate-assembled morphology.

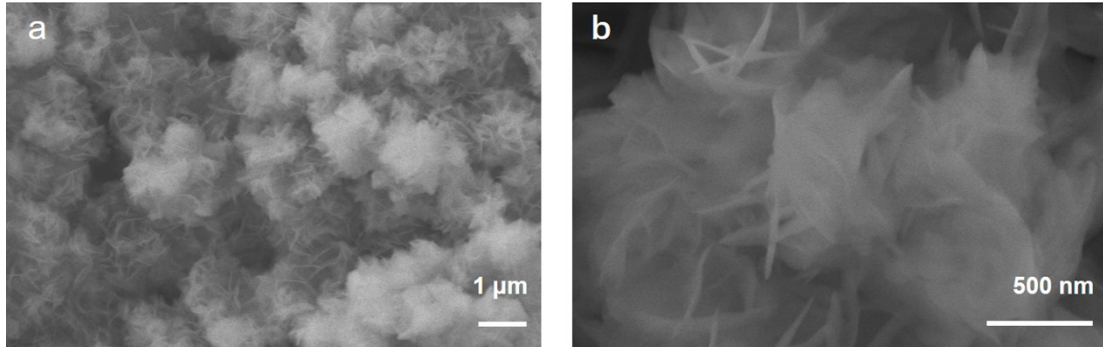

**Figure S8** SEM images of post-electrolysis (for 10 h) sample of VS-Bi<sub>2</sub>O<sub>3</sub>, showing the nanosheets morphology.

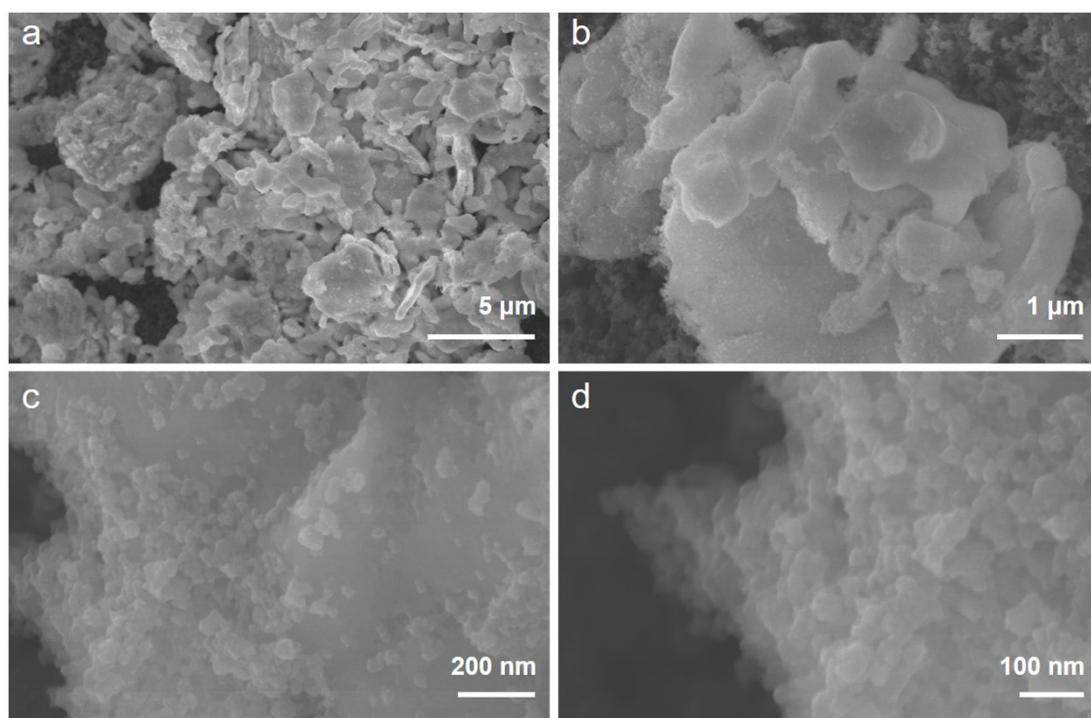

**Figure S9** SEM images of post-electrolysis (for 0.5 h) sample of B-Bi<sub>2</sub>O<sub>3</sub>.

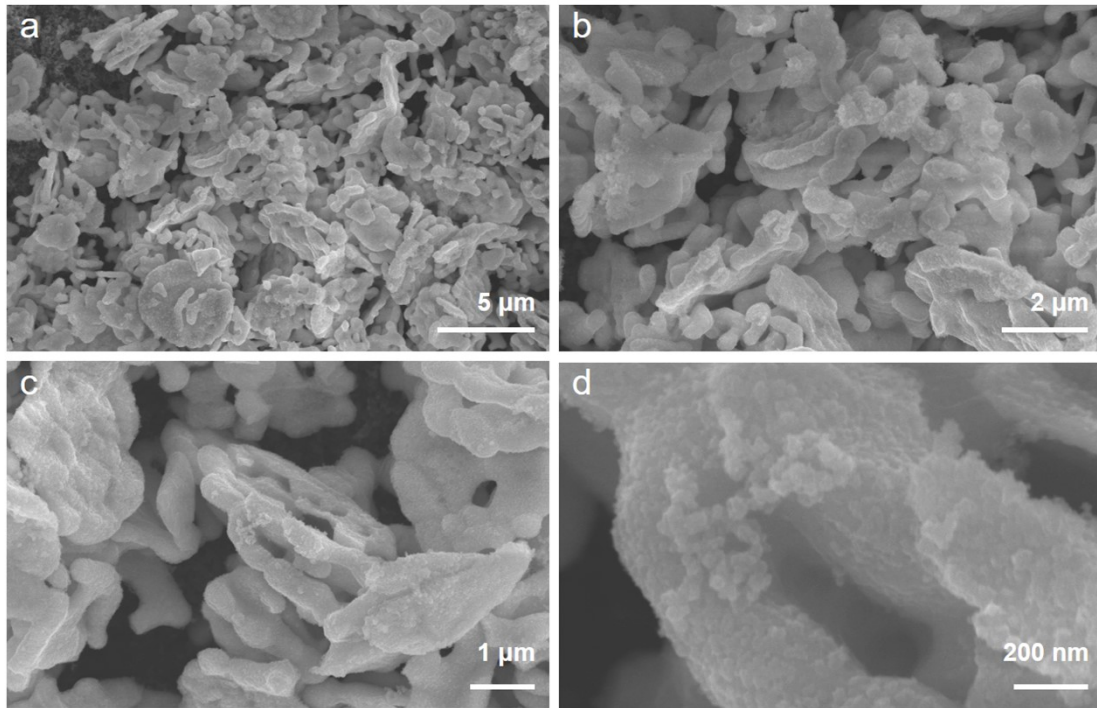

**Figure S10** SEM images of post-electrolysis (for 3 h) sample of B-Bi<sub>2</sub>O<sub>3</sub>.

**Table S1** Conditions of three different samples. All samples were assembled in the flow cell setup and lasted for 30 min, whose electrolyte was 1 M KOH.

| Line color                                     | black | blue            | red             |
|------------------------------------------------|-------|-----------------|-----------------|
| Gas                                            | Ar    | CO <sub>2</sub> | CO <sub>2</sub> |
| Applied current density (mA cm <sup>-2</sup> ) | 0     | 0               | 100             |

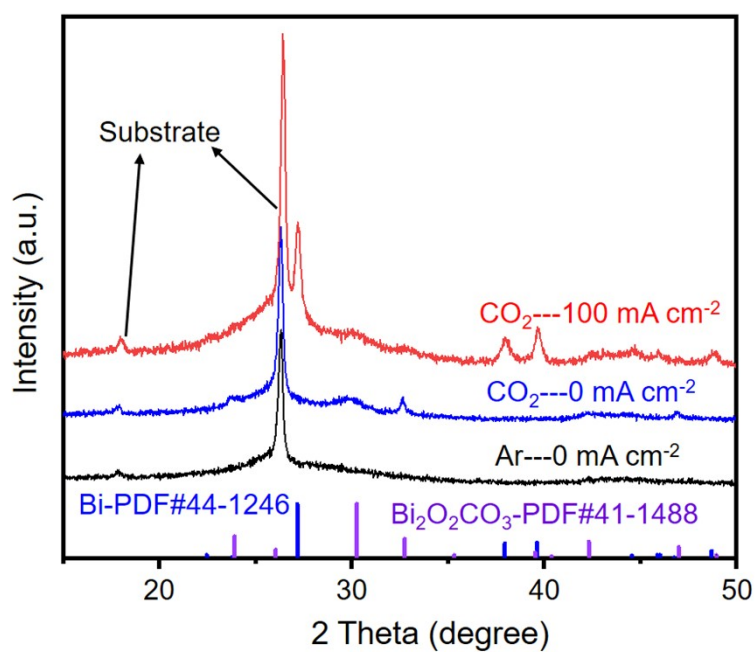

**Figure S11** XRD patterns of VS-Bi<sub>2</sub>O<sub>3</sub> after 30 min at different conditions, revealing the effects of CO<sub>2</sub> gas and applied current density.

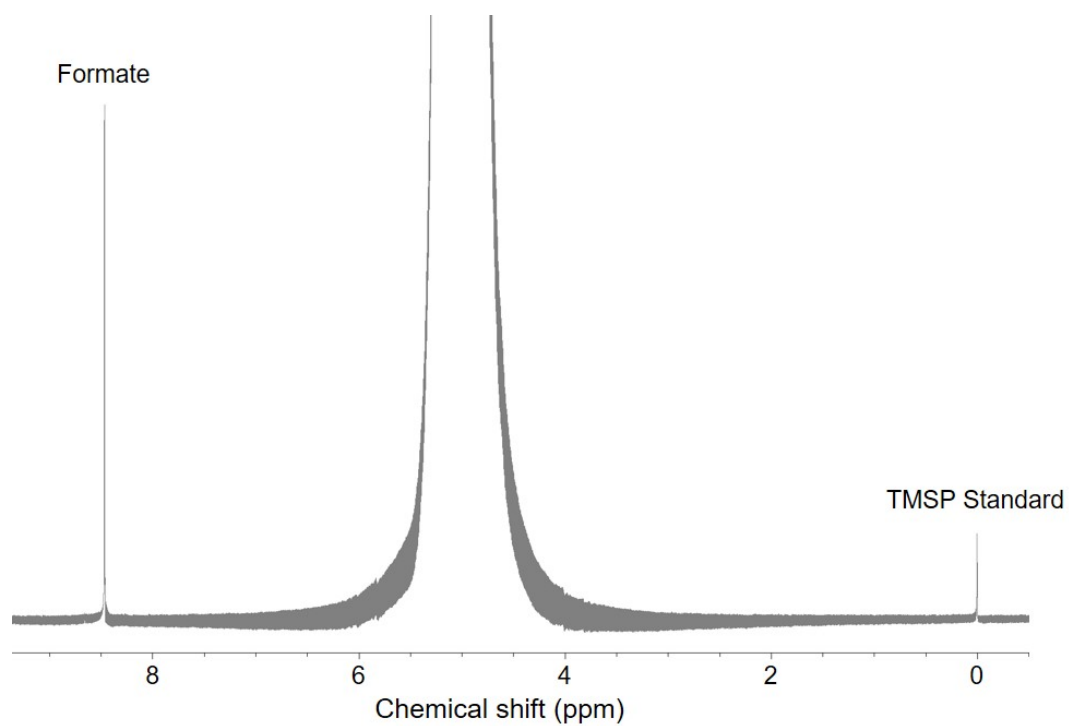

**Figure S12**  $^1\text{H}$  NMR result of liquid product of VS- $\text{Bi}_2\text{O}_3$  in 1 M KOH electrolyte after electrolysis at the current density of  $200 \text{ mA cm}^{-2}$  for 1 h.

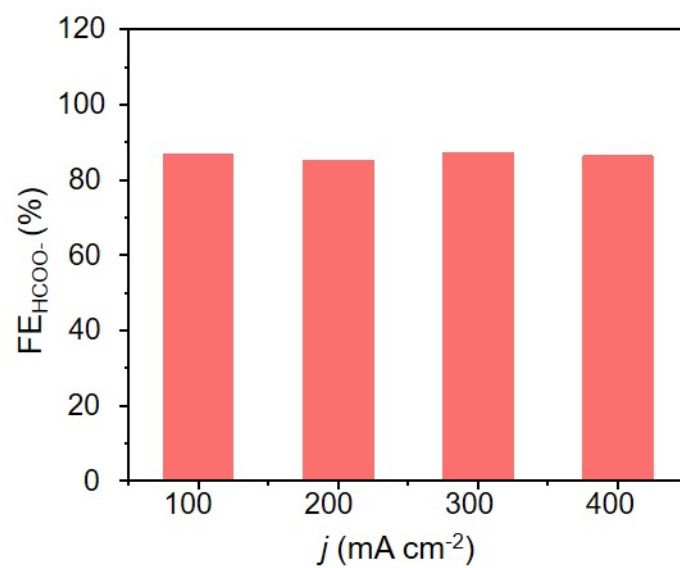

**Figure S13** Formate Faradaic efficiency plot of B-Bi<sub>2</sub>O<sub>3</sub> at different current densities in 1 M KOH electrolyte in the flow cell system.



**Table S2.** CO<sub>2</sub>RR activity and selectivity comparison of Bi-based catalysts.

| Materials                                    | Potential (V vs. RHE, without iR compensation) | FE(HCOO <sup>-</sup> ) | Current density (mA cm <sup>-2</sup> ) | Cell         | Electrolyte                 | Reference        |
|----------------------------------------------|------------------------------------------------|------------------------|----------------------------------------|--------------|-----------------------------|------------------|
| Bi <sub>2</sub> O <sub>3</sub><br>NS@MCCM    | -1.26                                          | 93.8                   | ~15                                    | H<br>cell    | 0.1 M<br>KHCO <sub>3</sub>  | 1                |
| f-Bi <sub>2</sub> O <sub>3</sub>             | -1.20                                          | 87                     | 25.3                                   | H<br>cell    | 0.1 M<br>KHCO <sub>3</sub>  | 2                |
| Bi NTs                                       | -1.00                                          | ~95                    | 24                                     | H<br>cell    | 0.5 M<br>KHCO <sub>3</sub>  | 3                |
| CuBi                                         | -1.00                                          | 90                     | 20                                     | H<br>cell    | 0.5 M<br>KHCO <sub>3</sub>  | 4                |
| Bi <sub>2</sub> S <sub>3</sub> derived<br>Bi | -0.75                                          | 84                     | 5                                      | H<br>cell    | 0.5 M<br>NaHCO <sub>3</sub> | 5                |
|                                              | -1.05                                          | 93                     | 64.5                                   | H<br>cell    | 0.5 M<br>KHCO <sub>3</sub>  |                  |
| Bi <sub>2</sub> O <sub>3</sub> NTs           | -0.78                                          | 99                     | ~80                                    |              |                             | 6                |
|                                              | -0.83                                          | 97                     | ~120                                   | Flow<br>cell | 1 M<br>KHCO <sub>3</sub>    |                  |
|                                              | -0.56                                          | 98                     | ~170                                   |              |                             |                  |
|                                              | -0.90                                          | 92                     | 7.5                                    | H<br>cell    | 0.5 M<br>KHCO <sub>3</sub>  | 7                |
| Bi <sub>2</sub> O <sub>3</sub> @C            | -1.10                                          | 93                     | ~223.7                                 | Flow<br>cell | 1 M KOH                     |                  |
|                                              | -0.90                                          | 98.6                   | 26.5                                   | H<br>cell    | 0.5 M<br>KHCO <sub>3</sub>  |                  |
| Bi-ene                                       | -1.10                                          | 99.6                   | 26.5                                   | Flow<br>cell | 1 M<br>KHCO <sub>3</sub>    | 8                |
|                                              | -0.57                                          | 99.8                   | 100                                    |              |                             |                  |
|                                              | -0.75                                          | 99.2                   | 200                                    |              | 1 M KOH                     |                  |
| BiVO <sub>4</sub><br>derived Bi-<br>ene      | -1.00                                          | 97.4                   | 105.4                                  | Flow<br>cell | 1 M<br>KHCO <sub>3</sub>    | 9                |
| VS-Bi <sub>2</sub> O <sub>3</sub>            | -1.66                                          | 93.7                   | 400                                    | Flow<br>cell | 1 M KOH                     | <i>This work</i> |

## References:

1. S. Liu, X. F. Lu, J. Xiao, X. Wang and X. W. D. Lou, Bi<sub>2</sub>O<sub>3</sub> nanosheets grown on multi-channel carbon matrix to catalyze efficient CO<sub>2</sub> electroreduction to HCOOH, *Angew. Chem. Int. Ed.*, 2019, **58**, 13828-13833.
2. T. Tran-Phu, R. Daiyan, Z. Fusco, Z. Ma, R. Amal and A. Tricoli, Nanostructured β-Bi<sub>2</sub>O<sub>3</sub> Fractals on Carbon Fibers for Highly Selective CO<sub>2</sub> Electroreduction to Formate, *Adv. Funct. Mater.*, 2019, **30**, 1906478.
3. K. Fan, Y. Jia, Y. Ji, P. Kuang, B. Zhu, X. Liu and J. Yu, Curved surface boosts electrochemical CO<sub>2</sub> reduction to formate via bismuth nanotubes in a wide potential window, *ACS Catal.*, 2019, **10**, 358-364.
4. M. Y. Zu, L. Zhang, C. Wang, L. R. Zheng and H. G. Yang, Copper-modulated bismuth nanocrystals alter the formate formation pathway to achieve highly selective CO<sub>2</sub> electroreduction, *J. Mater. Chem. A*, 2018, **6**, 16804-16809.
5. Y. Zhang, F. Li, X. Zhang, T. Williams, C. D. Easton, A. M. Bond and J. Zhang, Electrochemical reduction of CO<sub>2</sub> on defect-rich Bi derived from Bi<sub>2</sub>S<sub>3</sub> with enhanced formate selectivity, *J. Mater. Chem. A*, 2018, **6**, 4714-4720.
6. Q. Gong, P. Ding, M. Xu, X. Zhu, M. Wang, J. Deng, Q. Ma, N. Han, Y. Zhu, J. Lu, Z. Feng, Y. Li, W. Zhou and Y. Li, Structural defects on converted bismuth oxide nanotubes enable highly active electrocatalysis of carbon dioxide reduction, *Nat. Commun.*, 2019, **10**, 2807.
7. P. Deng, F. Yang, Z. Wang, S. Chen, Y. Zhou, S. Zaman and B. Y. Xia, Metal-organic framework-derived carbon nanorods encapsulating bismuth oxides for rapid

and selective CO<sub>2</sub> electroreduction to formate, *Angew. Chem. Int. Ed.*, 2020, **59**, 10807-10813.

8. C. Cao, D. D. Ma, J. F. Gu, X. Xie, G. Zeng, X. Li, S. G. Han, Q. L. Zhu, X. T. Wu and Q. Xu, Metal-organic layers leading to atomically thin bismuthene for efficient carbon dioxide electroreduction to liquid fuel, *Angew. Chem. Int. Ed.*, 2020, **59**, 15014-15020.

9. W. Ma, J. Bu, Z. Liu, C. Yan, Y. Yao, N. Chang, H. Zhang, T. Wang and J. Zhang, Monoclinic scheelite bismuth vanadate derived bismuthene nanosheets with rapid kinetics for electrochemically reducing carbon dioxide to formate, *Adv. Funct. Mater.*, 2020, **31**, 2006704.
